# Supplementary material
Source: ML conference proceedings conference paper supplement (https://openreview.net/forum?id=3YUL5LJ3s4)
Supplement: supplementary_material [file appendix.pdf › Appendix/appendix.pdf]

---

## APPENDIX

In the preparation of this paper, we would like to acknowledge the limited use of large language models (LLMs) for language polishing purposes. Both the core ideas and the substantive content of this paper represent our original work. The writing process proceeded as follows: after completing approximately 95% of the manuscript through our own efforts, we engaged in multiple rounds of self-revision to refine the arguments and presentation. Only at the final stage did we employ LLMs exclusively for minor language enhancement and proofreading. We estimate that the contribution of LLMs to the overall work constitutes no more than 2%, primarily focused on improving grammatical fluency and stylistic consistency. We are sincerely grateful for this assistance, which helped enhance the clarity of our presentation while maintaining full intellectual ownership of the research content. The fundamental research questions, methodological approach, analytical framework, and scholarly contributions remain entirely our own.
